# Supplementary material
Source: PubMed Central journal article supplement (PMC2811969)
Supplement: supp_92_2_338__1.pdf [file supp_92_2_338__1.pdf]

TABLE E-1 Design Features of Studies Characterizing the Association Between Race or Ethnicity and Outcome of Total Knee Replacement, Total Hip Replacement, Hip Fracture, and/or Spinal Surgery

| Study                               | Index Procedure                | Sample size (No.) | No. (%) of Minority Patients in Sample | Data Source                                                                                                                                    | Objective*                                                                                                                                                                                                                           |
|-------------------------------------|--------------------------------|-------------------|----------------------------------------|------------------------------------------------------------------------------------------------------------------------------------------------|--------------------------------------------------------------------------------------------------------------------------------------------------------------------------------------------------------------------------------------|
| White et al. <sup>35</sup> (1990)   | Primary total hip replacement  | 9580              | 857 (8.9)                              | 1984 and 1985 California Health Facilities Discharge Data                                                                                      | To determine whether early in-hospital morbidity and mortality after total hip replacement are increased for recipients with rheumatoid arthritis compared with recipients with osteoarthritis                                       |
| Whittle et al. <sup>33</sup> (1993) | Elective total hip replacement | 4711              | Not reported                           | 1/1/1983-12/31/1985 Medicare claim files                                                                                                       | To determine mortality after elective total hip arthroplasty among elderly Americans of different ages, gender, and race and with different indications for surgery                                                                  |
| Collins et al. <sup>31</sup> (1999) | Total knee replacement         | 2848              | 407 (14.3)                             | 10/1/1991-12/31/1993 Phase-I data and 1/1/1984-8/31/1995 Phase-II data from the Veterans Affairs National Surgical Quality Improvement Program | To determine the independent association of intraoperative process of care and postoperative events with prolonged LOS after adjusting for preoperative severity of illness in surgical recipients undergoing major elective surgery |
| Mahomed et al. <sup>22</sup> (2003) | Primary total hip replacement  | 61,568            | 2272 (3.6)                             | 7/1/1995-6/30/1996 Medicare claims data part A and part B                                                                                      | To characterize the rates and immediate postoperative outcomes of primary and revision total hip replacement in persons sixty-five years of age and older residing in the United States                                              |
|                                     | Revision hip replacement       | 13,483            | 563 (4.1)                              |                                                                                                                                                |                                                                                                                                                                                                                                      |

|                                          |                                |         |                |                                                                                                                      |                                                                                                                                           |
|------------------------------------------|--------------------------------|---------|----------------|----------------------------------------------------------------------------------------------------------------------|-------------------------------------------------------------------------------------------------------------------------------------------|
| Weaver et al. <sup>32</sup><br>(2003)    | Primary total hip replacement  | 6876    | 1539<br>(22.4) | 10/1991-9/1997<br>Veterans Affairs<br>National Surgical<br>Quality<br>Improvement<br>Program (NSQIP)<br>dataset      | To examine the risks and outcomes of TJA in VA hospitals using prospectively collected data                                               |
|                                          | Primary total knee replacement | 11,710  | 2226<br>(19.0) |                                                                                                                      |                                                                                                                                           |
| Feinglass et al. <sup>34</sup><br>(2004) | Primary total knee replacement | 35,531  | Not reported   | 1993-1999 Illinois Hospital and Health Systems Association COMPdata files from 65 Illinois hospitals                 | To provide an updated regional analysis of inpatient complications for primary TKR based on data from a 7-year period                     |
| Ibrahim et al. <sup>30</sup><br>(2005)   | Primary total hip replacement  | 6703    | 1361<br>(20.3) | 10/1/1996-9/30/2000<br>Veterans Affairs<br>National Surgical<br>Quality<br>Improvement<br>Program (NSQIP)<br>dataset | To examine racial and/or ethnic differences in mortality and morbidity following an elective knee or hip arthroplasty                     |
|                                          | Primary total knee replacement | 12,108  | 1943<br>(16.0) |                                                                                                                      |                                                                                                                                           |
| Mahomed et al. <sup>26</sup><br>(2005)   | Primary total knee replacement | 124,986 | 6704<br>(5.4)  | 1/1/2000-12/1/2000<br>Medicare claims data part A and part B                                                         | To report on the utilization and short-term outcomes of primary and revision total knee replacement in the U.S. Medicare population       |
|                                          | Revision knee replacement      | 11,726  | 763 (6.5)      |                                                                                                                      |                                                                                                                                           |
| SooHoo et al. <sup>36</sup><br>(2006)    | Primary total knee replacement | 222,684 | 44,537<br>(20) | 1991-2001<br>California's Office of Statewide Health Planning and Development (OSHPD) patient discharge database     | To examine the role of a variety of patient and hospital characteristics in determining adverse outcomes following total knee replacement |

\*LOS = length of stay, TJA = total joint arthroplasty, and TKR = total knee replacement.
